# Supplementary material for: The novel protein DELAYED PALE-GREENING1 is required for early chloroplast biogenesis in Arabidopsis thaliana
Source: PubMed Central journal article supplement (PMC4861969; doi:10.1038/srep25742), 2016-05-10
Supplement: srep25742-s1.pdf [file srep25742-s1.pdf]

**The novel protein DELAYED PALE-GREENING1 is required  
for early chloroplast biogenesis in *Arabidopsis thaliana***

Dong Liu\*, Weichun Li & Jianfeng Cheng

College of Agronomy/Key Laboratory of Crop Physiology, Ecology and Genetic  
Breeding, Ministry of Education, Jiangxi Agricultural University, Nanchang,  
330045, China

Author of correspondence:

Dong Liu

College of Agronomy/Key Laboratory of Crop Physiology, Ecology and Genetic  
Breeding, Ministry of Education

Jiangxi Agricultural University

Nanchang 330045

China

Tel: (86) 0791-83828081

Fax: (86) 0791-83828081

E-mail: liudongbio@163.com

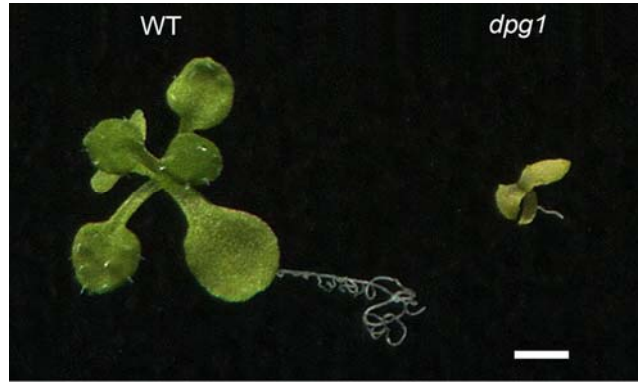

**Supplementary Figure S1.** Phenotypes of the wild type (WT) and *dpg1* mutant grown on 1/2 MS medium without sucrose for 28 days.

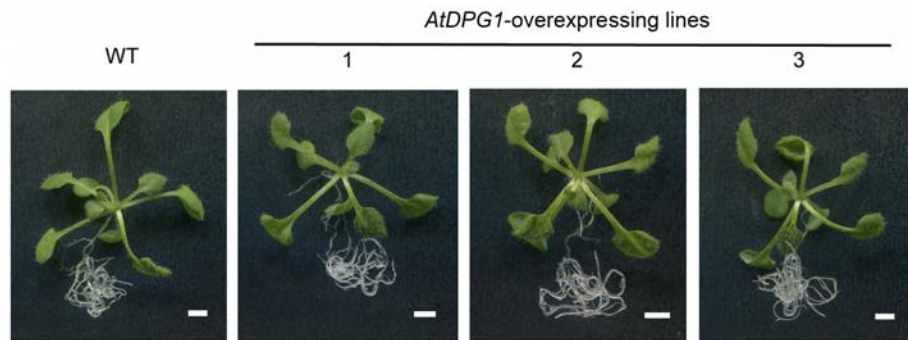

**Supplementary Figure S2.** Phenotypes of wild-type (WT) and *AtDPG1*-overexpressing lines grown on 1/2 MS medium for 21 days. Scale bar = 2 mm.

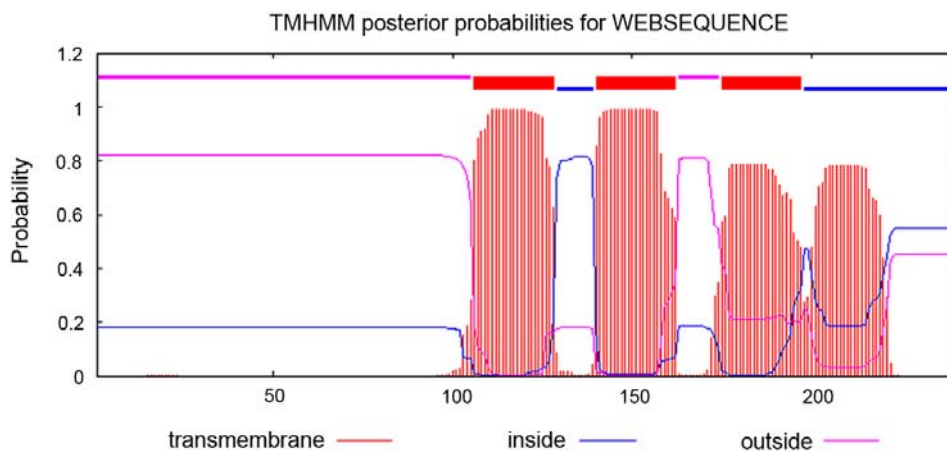

**Supplementary Figure S3.** Presence of transmembrane domain was calculated using TMHMM 2.0 Server. Red colour represents the transmembrane helices. The prediction indicates the presence of 3 domains in *AtDPG1*.

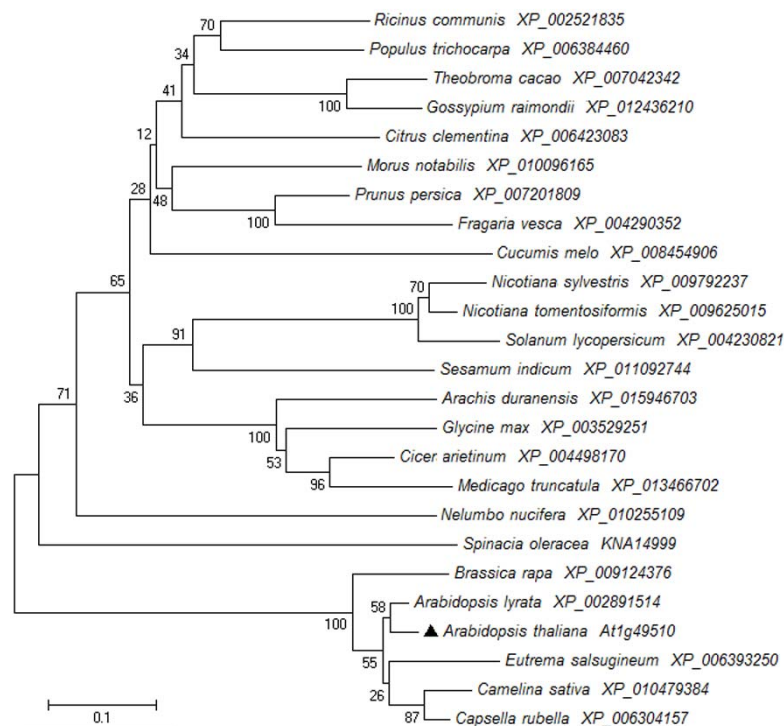

**Supplementary Figure S4.** A phylogenetic analysis of putative DPG1 homologues using MEGA 5.1 and a neighbor-joining method. A bootstrap analysis was performed with 1 000 replicates. Numbers in branches indicate bootstrap values (%).

**Supplementary Table S1. Decreased fertility in the *dpg1* mutant**

|                                    | WT         | <i>dpg1</i> |
|------------------------------------|------------|-------------|
| Total number of siliques per plant | 157.2±31.5 | 25.3±7.2*   |
| Total number of seeds per silique  | 54.5±3.1   | 12.1±2.4*   |

Each value is the mean±SE of three independent determinations and asterisk indicates significant differences (Student's *t* test: \*P<0.05)

**Supplementary Table S2. List of primers used in this study**

| Primer name      | Primer sequence (5'-3')        | Function                              |
|------------------|--------------------------------|---------------------------------------|
| <i>LBb1.3</i>    | ATTTTGCCGATTTTCGGAAC           |                                       |
| <i>DPG1-LP</i>   | ACGAGTCCGACGTTGTGATAC          | Identifying <i>dpg1</i> mutant by PCR |
| <i>DPG1-RP</i>   | TCCCAAACATGTTTGGTTCTC          |                                       |
| <i>PDPG1-F</i>   | CCCAAGCTTATTGGTAACTATCAAAGCG   | Amplification of <i>AtDPG1</i>        |
| <i>PDPG1-R</i>   | CATGCCATGGTTATTTATTAACCTCTCTGT | promoter                              |
| <i>OEDGY1-F</i>  | CATGCCATGGCGATGTCTCATCTCTTTCTT | Amplification of <i>AtDPG1</i> coding |
| <i>OEDGY1-R</i>  | GATGGGTAACCTCATTCTGTTTCCAAACTG | region                                |
| <i>AtDPG1-F1</i> | ACGATTTCTCTCTCTCTCATTAGGC      | Identifying <i>dpg1</i> mutant by     |
| <i>AtDPG1-R1</i> | ACAATCATGGGTTGGTTTCTTACTT      | semi-quantitative PCR                 |
| <i>AtDPG1-F2</i> | TCTCTTTCTTTCTTCTTCGCCTC        | Identifying 35S:: <i>AtDPG1</i>       |
| <i>AtDPG1-R2</i> | CTTAAGACGAGGCGAGATCTTCA        | transgenic lines by                   |
|                  |                                | semi-quantitative PCR                 |
| <i>ACTIN2-F</i>  | CAAACGAGGGCTGGAACAAGACT        | Semi-quantitative PCR analysis        |
| <i>ACTIN2-R</i>  | GCAACTGGGATGATATGGAAAAGA       | of <i>ACTIN2</i> gene                 |
| <i>rAtDPG1-F</i> | TCTCTTTCTTTCTTCTTCGCCTC        | Quantitative PCR analysis of          |
| <i>rAtDPG1-R</i> | TCCCAAACATGTTTGGTTCTC          | <i>AtDPG1</i> gene                    |
| <i>rPSAA-F</i>   | TCCTGAATGGAGATGTGGGCG          | Quantitative PCR analysis of          |
| <i>rPSAA-R</i>   | TAAGGCTGCGAAGACCAATGC          | <i>PSAA</i> gene                      |
| <i>rPSAB-F</i>   | GTATTACCGCATCCCAAGGG           | Quantitative PCR analysis of          |
| <i>rPSAB-R</i>   | GGGTTAGAATGGCAGTTCCGG          | <i>PSAB</i> gene                      |
| <i>rPSBA-F</i>   | TGAATGGCTATACAACGGCGG          | Quantitative PCR analysis of          |
| <i>rPSBA-R</i>   | GAAAACAGCAGTCGCAGCTGC          | <i>PSBA</i> gene                      |
| <i>rPSBB-F</i>   | CGTTGGGTATATTAGCGGGCC          | Quantitative PCR analysis of          |
| <i>rPSBB-R</i>   | AGGACGGTTTCAATATTGCC           | <i>PSBB</i> gene                      |
| <i>rRBCL-F</i>   | CCTGGAGTTCCACCTGAAGAAGC        | Quantitative PCR analysis of          |
| <i>rRBCL-R</i>   | TGGTAGCATCGTCTTTGTAACG         | <i>RBCL</i> gene                      |
| <i>rrpoA-F</i>   | ACGCGCTTATTTGTGTCCAAGG         | Quantitative PCR analysis of          |
| <i>rrpoA-R</i>   | GACTATATCCGCGATTCTCTC          | <i>rpoA</i> gene                      |
| <i>rrpoB-F</i>   | ATTGGATCATAATGGGATTTTCG        | Quantitative PCR analysis of          |
| <i>rrpoB-R</i>   | CTCGTAGATTCAAACCCATAGC         | <i>rpoB</i> gene                      |
| <i>rrpoC1-F</i>  | CTATAAAGAGTGGAATTTGCGC         | Quantitative PCR analysis of          |
| <i>rrpoC1-R</i>  | CCCATTTGATATCTTCGTATCC         | <i>rpoC1</i> gene                     |
| <i>rrpoC2-F</i>  | AACGATACCTTCTAAGGGCTGG         | Quantitative PCR analysis of          |
| <i>rrpoC2-R</i>  | ACCATATCTCAATAGATTGGCG         | <i>rpoC2</i> gene                     |
| <i>rHEMA1-F</i>  | TAATGGGGTTCGTGTTCTTCCG         | Quantitative PCR analysis of          |
| <i>rHEMA1-R</i>  | ATGCTAGCTGCATTAGACGCAG         | <i>HEMA1</i> gene                     |
| <i>rCHLH-F</i>   | TGGTAGAGAGACAGAAGCTCGAAA       | Quantitative PCR analysis of          |
| <i>rCHLH-R</i>   | CCAAAGAACCTGCCCAAGAG           | <i>CHLH</i> gene                      |
| <i>rCHL27-F</i>  | TCAAGACCGATTACAACCAGACA        | Quantitative PCR analysis of          |
| <i>rCHL27-R</i>  | CGCTCAAGGAACTCAACGAAG          | <i>CHL27</i> gene                     |
| <i>rCHLP-F</i>   | ACCAGAAACAGAGCTAAGGACAAGA      | Quantitative PCR analysis of          |

---

|                  |                          |                                                 |
|------------------|--------------------------|-------------------------------------------------|
| <i>rCHLP-R</i>   | GCATCACCTACAAGAGCCACAC   | <i>CHLP</i> gene                                |
| <i>rPORB-F</i>   | CAAACCGCTGCGACTTCAAGC    | Quantitative PCR analysis of <i>PORB</i> gene   |
| <i>rPORB-R</i>   | TGCACGCCATTATCACGTTCC    |                                                 |
| <i>rPORC-F</i>   | CAGACAGTTACAGCCACGCCG    | Quantitative PCR analysis of <i>PORC</i> gene   |
| <i>rPORC-R</i>   | TGTCTGCTAAAGCTTTGGCCG    |                                                 |
| <i>rCAO-F</i>    | TAGGGGTGAAGACGGGAAACC    | Quantitative PCR analysis of <i>CAO</i> gene    |
| <i>rCAO-R</i>    | CTCCATCGTTGAGTATTCCC     |                                                 |
| <i>rCLA1-F</i>   | GGTGAACCGGGTTAAATCTC     | Quantitative PCR analysis of <i>CLA1</i> gene   |
| <i>rCLA1-R</i>   | TGCACAGAAGGGTTTAAGGCC    |                                                 |
| <i>rOE23-F</i>   | GTATCTCCTGCTGATGCCGCC    | Quantitative PCR analysis of <i>OE23</i> gene   |
| <i>rOE23-R</i>   | TGGAACCTGCACTTTGAACCC    |                                                 |
| <i>rOE33-F</i>   | GTATCTCCTGCTGATGCCGCC    | Quantitative PCR analysis of <i>OE33</i> gene   |
| <i>rOE33-R</i>   | TGGAACCTGCACTTTGAACCC    |                                                 |
| <i>rPSAN-F</i>   | CTGTGATCAAAGCTCAACGCG    | Quantitative PCR analysis of <i>PSAN</i> gene   |
| <i>rPSAN-R</i>   | TTGGTTTTGCTCCTCTCGAGG    |                                                 |
| <i>rPSBW-F</i>   | TCTTGTTTTGCCTCCAATGGG    | Quantitative PCR analysis of <i>PSBW</i> gene   |
| <i>rPSBW-R</i>   | CTCATCAACCAAAGCCATCGC    |                                                 |
| <i>rLHCB1-F</i>  | GGTTTGTGTTTGTGGTGGATGGTA | Quantitative PCR analysis of <i>LHCB1</i> gene  |
| <i>rLHCB1-R</i>  | GTGAACCCAAGAAGTAAAATCCA  |                                                 |
| <i>rLHCA4-F</i>  | AACCCGCTTAACCTTGTCTCTAC  | Quantitative PCR analysis of <i>LHCA4</i> gene  |
| <i>rLHCA4-R</i>  | CAAACCCTAAGAATGCCAACATC  |                                                 |
| <i>rLHCB4-F</i>  | CAAGTTCTTTGACCCGCTAGG    | Quantitative PCR analysis of <i>LHCB4</i> gene  |
| <i>rLHCB4-R</i>  | GATGATGGTGGTGTGGAGTGG    |                                                 |
| <i>rRBCS-F</i>   | GGTCGCTCCTTTCAACGGACTT   | Quantitative PCR analysis of <i>RBCS</i> gene   |
| <i>rRBCS-R</i>   | ATTCGGAATCGGTAAGGTCAGG   |                                                 |
| <i>rGLK1-F</i>   | TATGACGGTGACAGTGACCGG    | Quantitative PCR analysis of <i>AtGLK1</i> gene |
| <i>rGLK1-R</i>   | AACTGTTCCACTGCCTCCACG    |                                                 |
| <i>rGLK2-F</i>   | TGTGTGTAAGCAAGAGGGTGG    | Quantitative PCR analysis of <i>AtGLK2</i> gene |
| <i>rGLK2-R</i>   | CTACCCCTAATTGCTCCACCG    |                                                 |
| <i>rACTIN2-F</i> | CAAACGAGGGCTGGAACAAGACT  | Quantitative PCR analysis of <i>ACTIN2</i> gene |
| <i>rACTIN2-R</i> | CTGTTGACTACGAGCAGGAGATGG |                                                 |

---

**Supplementary Table S3. The offspring segregated rates of the *dpg1* heterozygous carrying the *35S::AtDPG1* construction**

| Lines | Morphology |        | Segregated rates |
|-------|------------|--------|------------------|
|       | Green      | albino |                  |
| 1     | 185        | 7      | 26:1             |
| 2     | 176        | 17     | 10:1             |
| 3     | 210        | 14     | 15:1             |
| 4     | 169        | 17     | 10:1             |
| 5     | 113        | 23     | 5:1              |
| 6     | 39         | 3      | 13:1             |
| 7     | 68         | 2      | 34:1             |
| 8     | 37         | 6      | 6:1              |

**Supplementary Table S4. The prediction of subcellular localization of plant DPG1 proteins**

| Locus number | Gene name     | Number of amino acid residues | Prediction of the subcellular localization by ChloroP 1.1 <sup>a</sup> |                  |                       |                         |
|--------------|---------------|-------------------------------|------------------------------------------------------------------------|------------------|-----------------------|-------------------------|
|              |               |                               | Score <sup>b</sup>                                                     | cTP <sup>c</sup> | CS-score <sup>d</sup> | cTP-length <sup>f</sup> |
| At1g49510    | <i>AtDPG1</i> | 240                           | 0.561                                                                  | Y                | 2.351                 | 55                      |
| XP_002891514 | <i>AIDPG1</i> | 237                           | 0.520                                                                  | Y                | 4.081                 | 36                      |
| XP_010479384 | <i>CsDPG1</i> | 237                           | 0.520                                                                  | Y                | 0.855                 | 41                      |
| XP_006304157 | <i>CrDPG1</i> | 238                           | 0.512                                                                  | Y                | 2.351                 | 54                      |
| XP_006393250 | <i>EsDPG1</i> | 239                           | 0.575                                                                  | Y                | 3.356                 | 40                      |
| XP_009124376 | <i>BrDPG1</i> | 224                           | 0.493                                                                  | Y                | 1.581                 | 26                      |
| XP_006423083 | <i>CcDPG1</i> | 249                           | 0.519                                                                  | Y                | 8.406                 | 57                      |
| XP_007042342 | <i>TcDPG1</i> | 256                           | 0.506                                                                  | Y                | 4.303                 | 49                      |
| XP_010096165 | <i>MnDPG1</i> | 247                           | 0.538                                                                  | Y                | -0.817                | 54                      |
| XP_007201809 | <i>PpDPG1</i> | 237                           | 0.499                                                                  | -                | 4.207                 | 25                      |
| XP_009792237 | <i>NsDPG1</i> | 253                           | 0.568                                                                  | Y                | 1.269                 | 64                      |
| XP_006384460 | <i>PtDPG1</i> | 231                           | 0.542                                                                  | Y                | 0.318                 | 19                      |

<sup>a</sup>Subcellular localization predicted by the ChloroP 1.1 program (<http://www.cbs.dtu.dk/services/ChloroP/>). Score<sup>b</sup>: Output score from the second step network, the prediction cTP/no cTP is based solely on this score. cTP<sup>c</sup>: Whether or not this is predicted as a cTP-containing sequence; "Y" means that the sequence is predicted to contain a cTP; "-" means that is predicted not to contain a cTP. CS-score<sup>d</sup>: The MEME scoring matrix score for the suggested cleavage site. cTP-length<sup>f</sup>: The predicted length of the presequence (Please note that the prediction of the transit peptide length is carried out and presented even if its presence is not predicted). Similar results were obtained when using the PREDOTAR V1.03 (<http://urgi.versailles.inra.fr/predotar/predotar.html>) and IPSORT (<http://hc.ims.u-tokyo.ac.jp/iPSORT/>) subcellular localization tools.
